# Supplementary material for: An ecological approach to monitor geographic disparities in cancer outcomes
Source: PubMed Central journal article supplement (PMC6588275; doi:10.1371/journal.pone.0218712), 2019-06-21
Supplement: pone.0218712.s001.pdf [file pone.0218712.s001.pdf]

S1 Table. Factor loadings and fit statistics for composite county-level SES indices constructed using SES measures identified in previous studies

| SES domain         | County-level SES measures                                                       | Singh [1]<br>(N=3,138) | Saldana-Ruiz [2]<br>(N=3,138) | Yost [3]<br>(N=3,138) | Krieger [4]<br>(N=3,138) | Dayal [5]<br>(N=3,138) | Rubin [6]<br>(N=3,138) |
|--------------------|---------------------------------------------------------------------------------|------------------------|-------------------------------|-----------------------|--------------------------|------------------------|------------------------|
| Occupation         | % white-collar occupations <sup>a</sup>                                         | -0.308                 | 0.421                         | N/A                   | N/A                      | N/A                    | 0.375                  |
|                    | % working class <sup>b</sup>                                                    | N/A                    | N/A                           | -0.162                | -0.223                   | N/A                    | N/A                    |
| Education          | % less than 9 years of education                                                | 0.631                  | -0.841                        | N/A                   | N/A                      | N/A                    | -0.838                 |
|                    | % aged $\geq 25$ years and $\leq 12^{\text{th}}$ grade of education             | N/A                    | 0.927                         | N/A                   | -0.809                   | N/A                    | 0.898                  |
|                    | % aged $\geq 25$ years with at least a high school diploma                      | 0.253                  | N/A                           | N/A                   | N/A                      | -0.447                 | N/A                    |
|                    | % aged $\geq 25$ years and $\geq 4$ years of college                            | N/A                    | N/A                           | N/A                   | 0.618                    | N/A                    | N/A                    |
|                    | Education index (weighted school years) <sup>c</sup>                            | N/A                    | N/A                           | 0.683                 | N/A                      | N/A                    | N/A                    |
| Employment         | % aged $\geq 16$ years who are unemployed                                       | 0.297                  | N/A                           | -0.235                | -0.426                   | N/A                    | N/A                    |
|                    | % aged $\geq 16$ years who are employed                                         | N/A                    | N/A                           | N/A                   | N/A                      | N/A                    | N/A                    |
| Poverty            | % of persons below 150% of poverty line                                         | 0.889                  | N/A                           | -0.827                | N/A                      | N/A                    | N/A                    |
|                    | % of families below poverty level                                               | 0.820                  | N/A                           | N/A                   | N/A                      | N/A                    | -0.807                 |
|                    | % of persons below poverty line                                                 | N/A                    | N/A                           | N/A                   | -0.879                   | -0.561                 | N/A                    |
| Income             | Median family income                                                            | -0.949                 | N/A                           | N/A                   | N/A                      | N/A                    | N/A                    |
|                    | Income disparity <sup>d</sup>                                                   | 0.799                  | N/A                           | N/A                   | N/A                      | N/A                    | N/A                    |
|                    | Median HH income                                                                | N/A                    | N/A                           | 0.989                 | 0.824                    | 0.880                  | N/A                    |
|                    | % of total HH income in the area derived from interest, dividends, and net rent | N/A                    | N/A                           | N/A                   | 0.630                    | N/A                    | N/A                    |
| Ownership          | % home ownership                                                                | -0.468                 | N/A                           | N/A                   | 0.528                    | N/A                    | N/A                    |
|                    | % car ownership                                                                 | 0.466                  | N/A                           | N/A                   | 0.498                    | N/A                    | N/A                    |
|                    | % no telephone                                                                  | 0.683                  | N/A                           | N/A                   | -0.786                   | N/A                    | N/A                    |
|                    | % telephone access                                                              | N/A                    | 0.668                         | N/A                   | N/A                      | N/A                    | 0.729                  |
| Living crowdedness | % of HHs with more than one person per room                                     | 0.198                  | N/A                           | N/A                   | -0.371                   | N/A                    | N/A                    |
|                    | % of HHs with only one room                                                     | N/A                    | N/A                           | N/A                   | -0.088                   | N/A                    | N/A                    |
|                    | % of HHs without private plumbing                                               | 0.454                  | -0.214                        | N/A                   | -0.298                   | N/A                    | N/A                    |
|                    | % of HHs without kitchen                                                        | N/A                    | N/A                           | N/A                   | -0.060                   | N/A                    | N/A                    |

| SES domain                                                      | County-level SES measures                         | Singh [1]<br>(N=3,138)                          | Saldana-Ruiz [2]<br>(N =3,138) | Yost [3]<br>(N=3,138)                   | Krieger [4]<br>(N=3,138)                                                               | Dayal [5]<br>(N=3,138) | Rubin [6]<br>(N=3,138)        |
|-----------------------------------------------------------------|---------------------------------------------------|-------------------------------------------------|--------------------------------|-----------------------------------------|----------------------------------------------------------------------------------------|------------------------|-------------------------------|
| Living crowdedness Cont.                                        | % single-parent HHs with children aged < 18 years | 0.233                                           | N/A                            | N/A                                     | N/A                                                                                    | N/A                    | N/A                           |
| House                                                           | Median house value                                | -0.771                                          | N/A                            | 0.719                                   | N/A                                                                                    | 0.834                  | N/A                           |
|                                                                 | Median rent                                       | -0.840                                          | N/A                            | 0.849                                   | N/A                                                                                    | 0.959                  | N/A                           |
|                                                                 | Median monthly mortgage                           | -0.866                                          | N/A                            | N/A                                     | N/A                                                                                    | N/A                    | N/A                           |
|                                                                 | % with home worth ≥\$300 k                        | N/A                                             | N/A                            | N/A                                     | 0.362                                                                                  | N/A                    | N/A                           |
| <b>% of common variance explained</b>                           |                                                   | <b>76.2 %</b>                                   | <b>100%</b>                    | <b>84.8%</b>                            | <b>48.5%</b>                                                                           | <b>92.5%</b>           | <b>100%</b>                   |
| <b>TLI</b>                                                      |                                                   | <b>0.816</b>                                    | <b>0.800</b>                   | <b>0.530</b>                            | <b>0.287</b>                                                                           | <b>0.516</b>           | <b>0.729</b>                  |
| <b>Original study: area-level; US census years <sup>e</sup></b> |                                                   | Counties, Census tract and Zip code; 1970, 1990 | County; 1970,1980, 1990, 2000  | Census block groups in California; 1990 | Census tract, block group, and zip code level for Massachusetts and Rhode Island; 1990 | Census tract; 1970     | County; 1970,1980, 1990, 2000 |

- White-collar occupations include management, professional, and related occupations.
- Working class includes sales and office occupations, construction, extraction, and maintenance occupations, and production, transportation, and material moving occupations.
- A weight of 16 was applied to the proportion of persons in the county with a college education (pc); 12 was applied to the proportion with a high school education (phs) ; and nine was applied to the proportion with less than a high school education (po). The average years of schooling in a given county, (E) = (16\*pc) + (12\*phs) + (9\*po). [7]
- Income disparity in year 2010 was defined as the 100×ratio of number of households with < \$15,000 income to number of households with ≥\$75,000 income.
- Geographic level and US census years used to extract data in the original study to develop the index.

[1] Singh GK (2003) Area deprivation and widening inequalities in US mortality, 1969-1998. Am J Public Health 93 (7):1137-1143

[2] Saldana-Ruiz N, Clouston SA, Rubin MS, Colen CG, Link BG (2013) Fundamental causes of colorectal cancer mortality in the United States: understanding the importance of socioeconomic status in creating inequality in mortality. American journal of public health 103 (1):99-104

[3] Yost K, Perkins C, Cohen R, Morris C, Wright W (2001) Socioeconomic status and breast cancer incidence in California for different race/ethnic groups. Cancer Causes Control 12 (8):703-711

[4] Krieger N, Chen JT, Waterman PD, Soobader MJ, Subramanian SV, Carson R (2002) Geocoding and monitoring of US socioeconomic inequalities in mortality and cancer incidence: does the choice of area-based measure and geographic level matter?: the Public Health Disparities Geocoding Project. Am J Epidemiol 156 (5):471-482

[5] Dayal HH, Power RN, Chiu C (1982) Race and socio-economic status in survival from breast cancer. Journal of chronic diseases 35 (8):675-683

[6] Rubin MS, Clouston S, Link BG (2014) A fundamental cause approach to the study of disparities in lung cancer and pancreatic cancer mortality in the United States. Soc Sci Med 100:54-61. doi:10.1016/j.socscimed.2013.10.026

[7] Liu L, Deapen D, Bernstein L. Socioeconomic status and cancers of the female breast and reproductive organs: a comparison across racial/ethnic populations in Los Angeles County, California (United States). Cancer Causes & Control. 1998;9(4):369-80.

N Number of counties in 2000 US census, SES Socioeconomic status, HH Household, N/A Not Applicable
